# Supplementary material for: Burnout in residents during the first wave of the COVID-19 pandemic: a systematic review and meta-analysis
Source: Frontiers journal article supplement (doi:10.3389/fpsyt.2023.1286101), 2024-01-24

Supplementary Figure 2. Funnel plot of included studies in the overall prevalence analysis to study the publication bias.

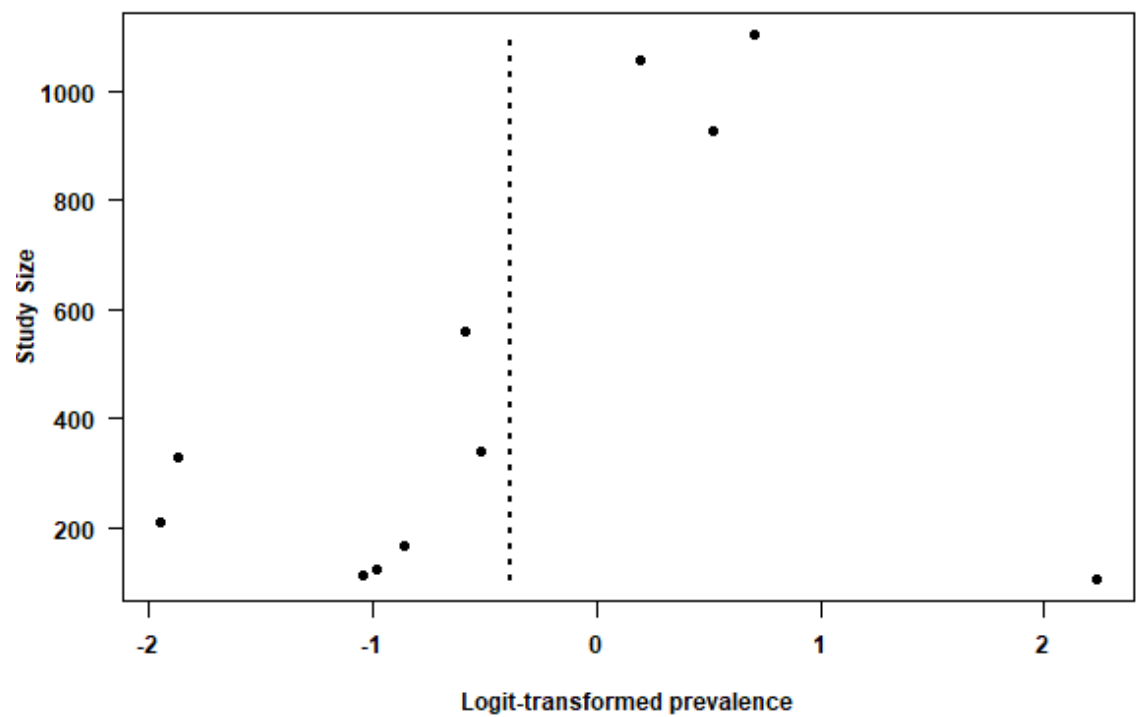

Supplement: Image_2.pdf [file Image_2.pdf]
